# Supplementary material for: The impact of stress hyperglycemia ratio and glycemic variability on 1-year all-cause mortality in critically ill patients with intracerebral hemorrhage: a two-center retrospective study
Source: Research Square preprint supplement (doi:10.21203/rs.3.rs-8312482/v1), 2026-01-12
Supplement: Supplementary file 1 [file 5748b40ed2131f811f281976.docx]

Supplementary Table 1 Summary of missing data in the entire cohort

| Variables | Number | Missing data | Missing percent |
| --- | --- | --- | --- |
| Age, (years) | 1861 | 6.00 | 0.30 |
| Gender (male/female) | 1867 | 0.00 | 0.00 |
| Weight, (Kg) | 1856 | 11.00 | 0.60 |
| Height, (cm) | 1749 | 118 | 6.30 |
| SBP, (mmHg) | 1854 | 13.00 | 0.70 |
| DBP, (mmHg) | 1854 | 13.00 | 0.70 |
| MAP, (mmHg) | 1854 | 13.00 | 0.70 |
| RR, (insp/min) | 1861 | 6.00 | 0.30 |
| HR, (bpm) | 1868 | 9.00 | 0.50 |
| Hypertension | 1867 | 0.00 | 0.00 |
| Diabetes | 1867 | 0.00 | 0.00 |
| AKI | 1867 | 0.00 | 0.00 |
| Pneumonia | 1867 | 0.00 | 0.00 |
| CKD | 1867 | 0.00 | 0.00 |
| Cancer | 1867 | 0.00 | 0.00 |
| Hyperlipidemia | 1867 | 0.00 | 0.00 |
| HF | 1867 | 0.00 | 0.00 |
| MI | 1867 | 0.00 | 0.00 |
| IHD | 1867 | 0.00 | 0.00 |
| COPD | 1867 | 0.00 | 0.00 |
| Anti-diabetes drugs | 1867 | 0.00 | 0.00 |
| Anti-hypertensive drugs | 1865 | 2.00 | 0.10 |
| Anti-platelets drugs | 321 | 1546 | 82.80 |
| Glucose, (mg/dL) | 1867 | 0.00 | 0.00 |
| D-Dimer, (ng/mL) | 1695 | 172.00 | 9.20 |
| PT, (s) | 1781 | 86.00 | 4.60 |
| HDL, (mg/dL) | 1718 | 149.00 | 8.00 |
| LDL, (mg/dL) | 1714 | 153.00 | 8.20 |
| Triglycerides, (mg/dL) | 1721 | 146.00 | 7.80 |
| ALT, (IU/L) | 1785 | 82.00 | 4.40 |
| AST, (IU/L) | 1783 | 84.00 | 4.50 |
| Creatinine, (mg/dL) | 1863 | 4.00 | 0.20 |
| Urea nitrogen, (mg/dL) | 1865 | 2.00 | 0.10 |
| Hemoglobin, (g/dL) | 1856 | 11.00 | 0.60 |
| Platelet, (K/UL) | 1854 | 13.00 | 0.70 |
| WBC, (K/UL) | 1854 | 13.00 | 0.70 |
| RBC, (m/uL) | 1856 | 11.00 | 0.60 |
| HbA1c, (%) | 1867 | 0.00 | 0.00 |
| AG, (mEq/L) | 1787 | 80.00 | 4.30 |
| Sodium, (mEq/L) | 1863 | 4.00 | 0.20 |
| Potassium, (mEq/L) | 1863 | 4.00 | 0.20 |
| CK, (IU/L) | 993 | 874.00 | 46.80 |
| BNP, (pg/mL) | 99 | 1768.00 | 94.70 |
| Albumin, (g/dL) | 1003 | 864.00 | 46.30 |
| Statins | 228 | 1639.00 | 87.80 |
| SOFA scores | 1864 | 3.00 | 0.15 |
| SAPS II | 1861 | 6.00 | 0.30 |
| GCS scores | 1861 | 6.00 | 0.10 |

BMI indicates body mass index; SBP, systolic blood pressure; DBP, diastolic blood pressure; MAP, mean arterial pressure; RR, respiratory rate; HR, heart rate; AKI, acute kidney injury; CKD, chronic kidney disease; MI, myocardial infarction; HF, heart failure; IHD, ischaemic heart disease; COPD, chronic obstructive pulmonary disease; SHR, stress hyperglycemia ratio; GV, glycemic variability; PT, prothrombin time; ALT, alanine aminotransferase; AST, aspartate aminotransferase; HDL, high-density lipoprotein; LDL, low-density lipoprotein; WBC, white blood cell; RBC, red blood cell; HbA1c, hemoglobin A1c; AG, anion gap; SOFA, Sequential Organ Failure Assessment; GCS, Glasgow Coma Scale; SAPS II, Simplified Acute Physiology Score II; CK, Creatine Kinase; BNP, B-type Natriuretic Peptide.

Supplementary Table 2 Variance inflation factor of each variable in the entire cohort

| Variables | GVIF | Df | GVIF^(1/(2*Df)) |
| --- | --- | --- | --- |
| Age, (years) | 2.00069003237573 | 1 | 1.41445750461996 |
| Gender (male/female) | 1.26678100719252 | 1 | 1.12551366370761 |
| BMI, (kg/m2) | 1.21672772210999 | 1 | 1.1030538165067 |
| SBP, (mmHg) | 2.94381765185217 | 1 | 1.71575570867538 |
| DBP, (mmHg) | 10.1207973587734 | 1 | 3.18132006544035 |
| MAP, (mmHg) | 14.454719952222 | 1 | 3.80193634247366 |
| RR, (insp/min) | 1.13236683492643 | 1 | 1.06412726444088 |
| HR, (bpm) | 1.19253591324198 | 1 | 1.09203292681218 |
| Hypertension | 3.20972433808286 | 1 | 1.79157035532598 |
| Diabetes | 8.00824117765903 | 1 | 2.82988359789922 |
| AKI | 1.47474795609585 | 1 | 1.21439201088275 |
| Pneumonia | 1.08556586163797 | 1 | 1.0419049196726 |
| CKD | 1.61449011666305 | 1 | 1.27062587596155 |
| Cancer | 1.10884253145664 | 1 | 1.05301592174888 |
| Hyperlipidemia | 1.20441723976196 | 1 | 1.09745944788951 |
| HF | 1.35594606503521 | 1 | 1.1644509715034 |
| MI | 1.38933037497914 | 1 | 1.17869859378008 |
| IHD | 1.52376304915741 | 1 | 1.23440797516762 |
| COPD | 1.07122338361855 | 1 | 1.0349992191391 |
| Anti-diabetes drugs | 7.82072016988446 | 1 | 2.79655505396988 |
| Anti-hypertensive drugs | 2.73452991744699 | 1 | 1.65364141138488 |
| Glucose, (mg/dL) | 14.3550308473146 | 1 | 3.78880335294861 |
| SHR, (mean±standard deviation) | 14.018810787547 | 1 | 3.74417024019301 |
| GV, (%) | 1.13457236892223 | 1 | 1.06516307151639 |
| D-Dimer, (ng/mL) | 1.0549215187921 | 1 | 1.02709372444393 |
| PT, (s) | 1.1143331368147 | 1 | 1.05561978799883 |
| HDL, (mg/dL) | 1.1843093510467 | 1 | 1.08825978104803 |
| LDL, (mg/dL) | 1.12620908865596 | 1 | 1.06122998857739 |
| Triglycerides, (mg/dL) | 1.08325527175858 | 1 | 1.04079549948997 |
| ALT, (IU/L) | 21.0548682154473 | 1 | 4.588558402749964 |
| AST, (IU/L) | 21.4996186431257 | 1 | 4.63676812479616 |
| Creatinine, (mg/dL) | 1.86000818876834 | 1 | 1.36382117184341 |
| Urea nitrogen, (mg/dL) | 2.22369416617369 | 1 | 1.49120560828267 |
| Hemoglobin, (g/dL) | 5.55413663718912 | 1 | 2.35672158669392 |
| Platelet, (K/UL) | 1.2584656899501 | 1 | 1.12181357183362 |
| WBC, (K/UL) | 1.06846772303989 | 1 | 1.03366712390396 |
| RBC, (m/uL) | 5.37130488588033 | 1 | 2.31760757805983 |
| HbA1c, (%) | 6.94004406451011 | 1 | 2.63439633778027 |
| AG, (mEq/L) | 1.24483778452935 | 1 | 1.11572298736261 |
| Sodium, (mEq/L) | 1.22542149014934 | 1 | 1.10698757452346 |
| Potassium, (mEq/L) | 1.19517738940754 | 1 | 1.09324168846945 |
| SOFA scores | 2.54064484639442 | 1 | 1.59394003851915 |
| SAPS II | 3.45392507934525 | 1 | 1.85847385758995 |
| GCS scores | 3.6741848284635 | 12 | 1.05571909058713 |

BMI indicates body mass index; SBP, systolic blood pressure; DBP, diastolic blood pressure; MAP, mean arterial pressure; RR, respiratory rate; HR, heart rate; AKI, acute kidney injury; CKD, chronic kidney disease; MI, myocardial infarction; HF, heart failure; IHD, ischaemic heart disease; COPD, chronic obstructive pulmonary disease; SHR, stress hyperglycemia ratio; GV, glycemic variability; PT, prothrombin time; ALT, alanine aminotransferase; AST, aspartate aminotransferase; HDL, high-density lipoprotein; LDL, low-density lipoprotein; WBC, white blood cell; RBC, red blood cell; HbA1c, hemoglobin A1c; AG, anion gap; SOFA, Sequential Organ Failure Assessment; GCS, Glasgow Coma Scale; SAPS II, Simplified Acute Physiology Score II.

Supplementary Table 3 Baseline characteristics of the survivor and non-survivor groups in the external cohort

| Variables | Overall (n=326) | Survivors (n=285) | Non-survivors (n=41) | p-value |
| --- | --- | --- | --- | --- |
| SHR | 0.81±0.68 | 0.78±0.68 | 0.83±0.66 | 0.014 |
| GV | 18.47 (8.72-29.63) | 17.88 (8.49-29.63) | 23.01 (13.85-29.29) | 0.021 |
| Demographics |  |  |  |  |
| Age, (years) | 53.41±14.56 | 51.68±15.10 | 54.81±14.47 | 0.019 |
| Gender (male/female) | 175.00 (53.68%) | 155.00 (54.39%) | 20.00 (48.78%) | 0.501 |
| BMI, (kg/m2) | 21.65 (19.96-23.57) | 21.57 (19.96-23.57) | 22.08 (20.51-23.79) | 0.296 |
| Vital signs |  |  |  |  |
| SBP, (mmHg) | 132.66±22.88 | 130.51±20.16 | 133.82±23.28 | 0.005 |
| DBP, (mmHg) | 75.73±12.94 | 72.27±11.65 | 77.08±13.10 | 0.016 |
| MAP, (mmHg) | 94.71±14.74 | 95.00±14.97 | 92.68±13.09 | 0.304 |
| RR, (insp/min) | 18.00 (15.00-22.00) | 18.00 (16.00-22.00) | 18.00 (15.00-21.00) | 0.322 |
| HR, (bpm) | 83.00 (71.00-96.00) | 84.00 (71.00-96.00) | 80.00 (67.00-97.00) | 0.543 |
| Comorbidities |  |  |  |  |
| Hypertension | 103.00 (31.60%) | 91.00 (31.93%) | 12.00 (29.27%) | 0.119 |
| Diabetes | 77.00 (23.62%) | 65.00 (22.81%) | 12.00 (29.27%) | 0.033 |
| AKI | 25.00 (7.67%) | 24.00 (8.42%) | 1.00 (2.44%) | 0.178 |
| Pneumonia | 208.00 (63.80%) | 177.00 (62.11%) | 31.00 (75.61%) | 0.092 |
| CKD | 27.00 (8.28%) | 24.00 (8.42%) | 3.00 (7.32%) | 0.810 |
| Cancer | 35.00 (10.74%) | 32.00 (11.23%) | 3.00 (7.32%) | 0.449 |
| Hyperlipidemia | 55.00 (16.87%) | 47.00 (16.49%) | 8.00 (19.51%) | 0.629 |
| HF | 36.00 (11.08%) | 28.00 (9.86%) | 8.00 (19.51%) | 0.046 |
| MI | 41.00 (12.58%) | 30.00 (10.53%) | 11.00 (26.83%) | 0.003 |
| IHD | 65.00 (19.94%) | 56.00 (19.65%) | 9.00 (21.95%) | 0.730 |
| COPD | 44.00 (13.50%) | 35.00 (12.28%) | 9.00 (21.95%) | 0.042 |
| Treatment during hospitalization |  |  |  |  |
| Anti-diabetes drugs | 46.00 (14.11%) | 41.00 (14.39%) | 5.00 (12.20%) | 0.706 |
| Anti-hypertensive drugs | 51.00 (17.89%) | 41.00 (14.39%) | 10.00 (24.39%) | 0.029 |
| Laboratory tests |  |  |  |  |
| Glucose, (mmol/L) | 5.01 (4.21-5.73) | 4.88 (4.18-5.65) | 5.54 (5.02-6.01) | 0.029 |
| D-Dimer, (ug/mL) | 0.54 (0.29-0.94) | 0.47 (0.23-0.83) | 0.51 (0.31-1.01) | 0.085 |
| PT, (s) | 13.15 (11.60-14.80) | 13.00 (11.60-14.80) | 13.60 (12.10-14.80) | 0.221 |
| HDL, (mmol/L) | 0.89 (0.67-1.03) | 0.89 (0.67-1.01) | 0.95 (0.76-1.15) | 0.207 |
| LDL, (mmol/L) | 2.27 (1.91-3.04) | 2.27 (1.98-3.04) | 2.17 (1.20-2.90) | 0.408 |
| Triglycerides, (mmol/L) | 0.98 (0.74-1.42) | 0.98 (0.73-1.44) | 0.89 (0.76-1.34) | 0.945 |
| ALT, (U/L) | 50.00 (26.00-81.00) | 49.00 (26.00-83.00) | 53.00 (32.00-77.00) | 0.862 |
| AST, (U/L) | 39.00 (24.00-78.00) | 38.00 (24.00-76.00) | 55.00 (32.00-88.00) | 0.080 |
| Creatinine, (umol/L) | 78.20 (65.30-92.00) | 78.10 (65.60-92.70) | 79.55 (63.60-85.20) | 0.089 |
| Urea nitrogen, (umol/L) | 4.54 (3.13-7.04) | 4.55 (3.16-7.04) | 4.38 (3.06-6.95) | 0.256 |
| Hemoglobin, (g/L) | 116.50 (108.00-125.00) | 116.00 (108.00-125.00) | 117.00 (109.00-123.00) | 0.864 |
| Platelet, (10^9/L) | 182.00 (136.00-233.00) | 182.00 (137.00-229.00) | 173.00 (134.00-248.00) | 0.738 |
| WBC, (10^9/L) | 8.55 (6.70-10.50) | 8.50 (6.50-10.50) | 8.90 (6.90-10.90) | 0.924 |
| RBC, (10^9/L) | 3.47 (3.17-3.94) | 3.46 (3.16-3.93) | 3.55 (3.23-4.08) | 0.531 |
| HbA1c, (%) | 5.30 (4.70-5.80) | 5.30 (4.70-5.80) | 5.50 (4.80-5.90) | 0.622 |
| AG, (mmol/L) | 14.00 (13.00-16.00) | 14.00 (12.00-16.00) | 15.00 (14.00-16.00) | 0.018 |
| Sodium, (mmol/L) | 138.70 (134.50-141.90) | 138.70 (134.40-141.90) | 138.40 (135.90-141.50) | 0.326 |
| Potassium, (mmol/L) | 3.41 (3.12-3.87) | 3.40 (3.11-3.81) | 3.55 (3.27-4.30) | 0.027 |
| Outcomes |  |  |  |  |
| GCS scores | 9.00 (8.00-11.00) | 9.00 (8.00-11.00) | 6.00 (6.00-8.00) | <0.001 |
| Length of ICU stay, (days) | 6.01 (3.81-11.16) | 5.43 (3.15-10.27) | 6.74 (3.98-11.89) | 0.005 |
| Length of hospital stay, (days) | 12.37 (7.01-19.64) | 9.94 (5.84-16.67) | 13.01 (8.45-20.76) | <0.010 |

BMI indicates body mass index; SBP, systolic blood pressure; DBP, diastolic blood pressure; MAP, mean arterial pressure; RR, respiratory rate; HR, heart rate; AKI, acute kidney injury; CKD, chronic kidney disease; MI, myocardial infarction; HF, heart failure; IHD, ischaemic heart disease; COPD, chronic obstructive pulmonary disease; SHR, stress hyperglycemia ratio; GV, glycemic variability; PT, prothrombin time; ALT, alanine aminotransferase; AST, aspartate aminotransferase; HDL, high-density lipoprotein; LDL, low-density lipoprotein; WBC, white blood cell; RBC, red blood cell; HbA1c, hemoglobin A1c; AG, anion gap; SOFA, Sequential Organ Failure Assessment; GCS, Glasgow Coma Scale; SAPSII, Simplified Acute Physiology Score II.

Supplementary Table 4 Comparison of baseline characteristics according to the three stress hyperglycemia ratio subgroups

| Variables | T 1, N=622 | T 2, N=622 | T 3, N=623 | p-value |
| --- | --- | --- | --- | --- |
| Demographics |  |  |  |  |
| Age, (years) | 66.27±16.34 | 67.65±15.60 | 68.91±13.93 | 0.041 |
| Gender (male/female) | 341.00 (54.82%) | 340.00 (54.66%) | 346.00 (55.54%) | 0.947 |
| BMI, (kg/m2) | 26.28 (22.72-31.20) | 26.52 (22.74-31.80) | 27.07 (23.28-31.24) | 0.256 |
| Vital signs |  |  |  |  |
| SBP, (mmHg) | 134.20±21.88 | 135.63±22.12 | 136.64±23.23 | 0.019 |
| DBP, (mmHg) | 75.75±17.95 | 76.71±17.68 | 77.38±18.97 | 0.032 |
| MAP, (mmHg) | 90.85±17.43 | 91.78±17.42 | 92.51±17.54 | 0.021 |
| RR, (insp/min) | 18.00 (15.00-21.00) | 18.00 (15.00-21.00) | 18.00 (16.00-22.00) | 0.108 |
| HR, (bpm) | 80.00 (70.00-93.00) | 81.00 (71.00-93.00) | 82.00 (72.00-94.00) | 0.153 |
| Comorbidities |  |  |  |  |
| Hypertension | 361.00 (58.04%) | 394.00 (63.34%) | 417.00 (66.93%) | <0.001 |
| Diabetes | 125.00 (20.10%) | 128.00 (20.58%) | 207.00 (33.23%) | <0.001 |
| AKI | 111.00 (17.85%) | 109.00 (17.52%) | 141.00 (22.63%) | 0.038 |
| Pneumonia | 118.00 (18.97%) | 146.00 (23.47%) | 186.00 (29.86%) | <0.001 |
| CKD | 53.00 (8.52%) | 71.00 (11.41%) | 90.00 (14.45%) | 0.014 |
| Cancer | 104.00 (16.72%) | 85.00 (13.67%) | 92.00 (14.77%) | 0.312 |
| Hyperlipidemia | 225.00 (36.17%) | 252.00 (40.51%) | 254.00 (40.77%) | 0.175 |
| HF | 61.00 (9.81%) | 83.00 (13.34%) | 94.00 (15.09%) | 0.017 |
| MI | 27.00 (4.34%) | 20.00 (3.22%) | 30.00 (4.82%) | 0.345 |
| IHD | 122.00 (19.61%) | 111.00 (17.85%) | 127.00 (20.39%) | 0.508 |
| COPD | 60.00 (9.65%) | 41.00 (6.59%) | 47.00 (7.54%) | 0.125 |
| Treatment during hospitalization |  |  |  |  |
| Anti-diabetes drugs | 113.00 (18.17%) | 114.00 (18.33%) | 165.00 (26.48%) | 0.017 |
| Anti-hypertensive drugs | 349.00 (56.11%) | 370.00 (59.49%) | 370.00 (59.39%) | 0.412 |
| Laboratory tests |  |  |  |  |
| Glucose, (mg/dL) | 99.00 (91.00-115.00) | 119.00 (108.00-136.00) | 161.00 (139.00-200.00) | <0.001 |
| GV, (%) | 14.65 (11.36-18.46) | 16.99 (13.56-22.12) | 17.10 (13.93-22.61) | <0.001 |
| D-Dimer, (ng/mL) | 1,880.00 (1,019.00-3,400.00) | 2,084.00 (1,075.00-3,675.00) | 1,885.00 (1,070.00-3,459.00) | 0.146 |
| PT, (s) | 12.70 (11.80-13.80) | 12.60 (11.70-13.60) | 12.70 (11.80-13.90) | 0.247 |
| HDL, (mg/dL) | 45.00 (34.00-57.00) | 47.00 (36.00-61.00) | 47.00 (36.00-59.00) | 0.039 |
| LDL, (mg/dL) | 71.00 (47.00-97.00) | 72.00 (49.00-99.00) | 65.00 (45.00-90.00) | 0.003 |
| Triglycerides, (mg/dL) | 100.00 (67.00-133.00) | 101.00 (70.00-137.00) | 102.00 (72.00-135.00) | 0.612 |
| ALT, (IU/L) | 24.00 (16.00-41.00) | 24.00 (16.00-42.00) | 24.00 (16.00-41.00) | 0.781 |
| AST, (IU/L) | 29.00 (20.00-47.00) | 30.00 (21.00-48.00) | 29.00 (20.00-47.00) | 0.634 |
| Creatinine, (mg/dL) | 0.80 (0.70-1.10) | 0.90 (0.70-1.10) | 0.90 (0.70-1.20) | 0.004 |
| Urea nitrogen, (mg/dL) | 15.00 (11.00-21.00) | 16.00 (12.00-21.00) | 17.00 (13.00-24.00) | <0.001 |
| Hemoglobin, (g/dL) | 12.40 (11.00-13.60) | 12.40 (11.10-13.50) | 12.10 (10.80-13.60) | 0.315 |
| Platelet, (K/UL) | 211.00 (160.00-262.00) | 210.00 (171.00-265.00) | 203.00 (159.00-255.00) | 0.128 |
| WBC, (K/UL) | 9.90 (7.70-12.60) | 10.60 (8.40-13.20) | 10.90 (8.50-13.80) | <0.001 |
| RBC, (m/uL) | 4.12 (3.65-4.53) | 4.10 (3.68-4.50) | 4.07 (3.63-4.47) | 0.231 |
| HbA1c, (%) | 5.60 (5.30-6.20) | 5.70 (5.40-6.20) | 6.20 (5.70-7.20) | <0.001 |
| AG, (mEq/L) | 14.00 (12.00-16.00) | 14.00 (12.00-16.00) | 14.00 (13.00-16.00) | 0.010 |
| Sodium, (mEq/L) | 139.00 (137.00-142.00) | 139.00 (137.00-142.00) | 140.00 (137.00-142.00) | 0.839 |
| Potassium, (mEq/L) | 3.90 (3.60-4.30) | 3.90 (3.60-4.20) | 3.90 (3.60-4.40) | 0.376 |
| Outcomes |  |  |  |  |
| SOFA scores | 3.00 (2.00-4.00) | 3.00 (1.00-4.00) | 3.00 (2.00-5.00) | <0.001 |
| SAPS II | 31.00 (24.00-38.00) | 32.00 (25.00-39.00) | 34.00 (27.00-42.00) | <0.001 |
| GCS scores | 14.00 (11.00-15.00) | 14.00 (10.00-15.00) | 13.00 (10.00-14.00) | <0.001 |
| Length of ICU stay, (days) | 4.13 (2.26-8.51) | 5.31 (2.96-9.94) | 6.04 (3.13-11.79) | <0.001 |
| Length of hospital stay, (days) | 10.64 (6.52-16.89) | 11.19 (6.92-18.74) | 12.08 (6.55-19.70) | 0.002 |

BMI indicates body mass index; SBP, systolic blood pressure; DBP, diastolic blood pressure; MAP, mean arterial pressure; RR, respiratory rate; HR, heart rate; AKI, acute kidney injury; CKD, chronic kidney disease; MI, myocardial infarction; HF, heart failure; IHD, ischaemic heart disease; COPD, chronic obstructive pulmonary disease; SHR, stress hyperglycemia ratio; GV, glycemic variability; PT, prothrombin time; ALT, alanine aminotransferase; AST, aspartate aminotransferase; HDL, high-density lipoprotein; LDL, low-density lipoprotein; WBC, white blood cell; RBC, red blood cell; HbA1c, hemoglobin A1c; AG, anion gap; SOFA, Sequential Organ Failure Assessment; GCS, Glasgow Coma Scale; SAPS II, Simplified Acute Physiology Score II.

The stress hyperglycemia ratio was categorized into tertiles as follows: T1 (≤0.90), T2 (0.91–1.14), and T3 (≥1.15).

Supplementary Table 5 Comparison of baseline characteristics according to the three glycemic variability subgroups

| Variables | T 1, N=622 | T 2, N=622 | T 3, N=623 | p-value |
| --- | --- | --- | --- | --- |
| Demographics |  |  |  |  |
| Age, (years) | 66.95±16.13 | 67.32±15.46 | 68.58±14.40 | 0.041 |
| Gender (male/female) | 348.00 (55.86%) | 333.00 (53.62%) | 346.00 (55.54%) | 0.693 |
| BMI, (kg/m2) | 26.71 (22.98-30.90) | 26.25 (22.54-31.57) | 26.85 (23.12-31.71) | 0.458 |
| Vital signs |  |  |  |  |
| SBP, (mmHg) | 134.75±21.42 | 135.90±22.16 | 136.63±23.65 | 0.012 |
| DBP, (mmHg) | 75.36±18.19 | 76.65±19.24 | 76.95±17.15 | 0.047 |
| MAP, (mmHg) | 90.61±17.34 | 91.46±17.97 | 92.06±17.07 | 0.017 |
| RR, (insp/min) | 18.00 (16.00-22.00) | 18.00 (15.00-21.00) | 18.00 (15.00-21.00) | 0.056 |
| HR, (bpm) | 83.00 (72.00-95.00) | 80.00 (70.00-92.00) | 80.00 (70.00-92.00) | 0.001 |
| Comorbidities |  |  |  |  |
| Hypertension | 374.00 (60.03%) | 392.00 (63.12%) | 406.00 (65.17%) | 0.168 |
| Diabetes | 106.00 (17.04%) | 126.00 (20.26%) | 228.00 (36.60%) | <0.001 |
| AKI | 85.00 (13.67%) | 129.00 (20.77%) | 147.00 (23.60%) | <0.001 |
| Pneumonia | 168.00 (26.97%) | 163.00 (26.25%) | 119.00 (19.10%) | 0.002 |
| CKD | 53.00 (8.52%) | 66.00 (10.61%) | 95.00 (15.25%) | <0.001 |
| Cancer | 100.00 (16.05%) | 84.00 (13.53%) | 97.00 (15.57%) | 0.417 |
| Hyperlipidemia | 251.00 (40.29%) | 230.00 (37.04%) | 250.00 (40.13%) | 0.416 |
| HF | 67.00 (10.77%) | 71.00 (11.41%) | 100.00 (16.05%) | 0.010 |
| MI | 31.00 (4.98%) | 24.00 (3.86%) | 22.00 (3.53%) | 0.406 |
| IHD | 150.00 (24.08%) | 99.00 (15.94%) | 111.00 (17.82%) | <0.001 |
| COPD | 50.00 (8.03%) | 49.00 (7.89%) | 49.00 (7.87%) | 0.994 |
| Treatment during hospitalization |  |  |  |  |
| Anti-diabetes drugs | 95.00 (15.27%) | 114.00 (18.33%) | 183.00 (29.37%) | <0.001 |
| Anti-hypertensive drugs | 354.00 (56.82%) | 356.00 (57.33%) | 379.00 (60.83%) | 0.353 |
| Laboratory tests |  |  |  |  |
| Glucose, (mg/dL) | 112.00 (98.00-131.00) | 125.00 (105.00-149.00) | 141.00 (113.00-181.00) | <0.001 |
| SHR, (mean±standard deviation) | 1.00±0.31 | 1.07±0.36 | 1.17±0.49 | <0.001 |
| D-Dimer, (ng/mL) | 2,084.00  (1,045.00-3,459.00) | 2,084.00 (1,045.00-3,600.00) | 1,881.00 (1,045.00-3,400.00) | 0.489 |
| PT, (s) | 12.90 (11.90-14.10) | 12.60 (11.70-13.54) | 12.50 (11.60-13.60) | 0.002 |
| HDL, (mg/dL) | 43.00 (33.00-55.00) | 47.00 (35.00-61.00) | 49.00 (38.00-62.00) | <0.001 |
| LDL, (mg/dL) | 66.00 (43.00-88.00) | 70.00 (47.00-97.00) | 72.00 (49.00-99.00) | 0.005 |
| Triglycerides, (mg/dL) | 95.00 (68.00-132.00) | 99.00 (68.00-131.00) | 109.00 (73.00-140.00) | 0.004 |
| ALT, (IU/L) | 24.00 (16.00-43.00) | 25.00 (16.00-40.00) | 23.00 (16.00-40.00) | 0.402 |
| AST, (IU/L) | 30.00 (20.00-50.00) | 29.00 (21.00-49.00) | 29.00 (20.00-45.00) | 0.531 |
| Creatinine, (mg/dL) | 0.80 (0.70-1.00) | 0.90 (0.70-1.10) | 0.90 (0.80-1.20) | <0.001 |
| Urea nitrogen, (mg/dL) | 15.00 (11.00-19.00) | 16.00 (12.00-22.00) | 17.00 (13.00-25.00) | <0.001 |
| Hemoglobin, (g/dL) | 12.18 (10.70-13.40) | 12.30 (11.00-13.50) | 12.50 (11.20-13.70) | 0.008 |
| Platelet, (K/UL) | 202.00 (157.00-256.00) | 209.00 (166.00-258.00) | 211.00 (167.00-268.00) | 0.045 |
| WBC, (K/UL) | 10.80 (8.30-13.70) | 10.70 (8.50-13.50) | 10.00 (7.90-12.80) | 0.010 |
| RBC, (m/uL) | 4.08 (3.63-4.45) | 4.07 (3.65-4.52) | 4.12 (3.71-4.51) | 0.194 |
| HbA1c, (%) | 6.00 (5.50-6.90) | 5.80 (5.40-6.40) | 5.70 (5.30-6.20) | <0.001 |
| AG, (mEq/L) | 15.00 (13.00-17.00) | 14.00 (12.00-16.00) | 14.00 (12.00-16.00) | 0.001 |
| Sodium, (mEq/L) | 139.00 (137.00-142.00) | 139.00 (137.00-142.00) | 139.00 (137.00-142.00) | 0.858 |
| Potassium, (mEq/L) | 4.00 (3.60-4.40) | 3.90 (3.60-4.20) | 3.90 (3.60-4.30) | 0.064 |
| Outcomes |  |  |  |  |
| SOFA scores | 2.00 (1.00-4.00) | 3.00 (2.00-5.00) | 3.00 (2.00-5.00) | <0.001 |
| SAPS II | 30.00 (24.00-38.00) | 33.00 (26.00-40.00) | 34.00 (27.00-43.00) | <0.001 |
| GCS scores | 14.00 (11.00-15.00) | 14.00 (11.00-15.00) | 13.00 (11.00-15.00) | 0.025 |
| Length of ICU stay, (days) | 4.44 (2.42-8.35) | 5.64 (2.86-11.08) | 5.78 (3.04-10.59) | <0.001 |
| Length of hospital stay, (days) | 8.96 (5.74-14.96) | 12.26 (7.61-18.90) | 12.30 (6.89-21.23) | <0.001 |

BMI indicates body mass index; SBP, systolic blood pressure; DBP, diastolic blood pressure; MAP, mean arterial pressure; RR, respiratory rate; HR, heart rate; AKI, acute kidney injury; CKD, chronic kidney disease; MI, myocardial infarction; HF, heart failure; IHD, ischaemic heart disease; COPD, chronic obstructive pulmonary disease; SHR, stress hyperglycemia ratio; GV, glycemic variability; PT, prothrombin time; ALT, alanine aminotransferase; AST, aspartate aminotransferase; HDL, high-density lipoprotein; LDL, low-density lipoprotein; WBC, white blood cell; RBC, red blood cell; HbA1c, hemoglobin A1c; AG, anion gap; SOFA, Sequential Organ Failure Assessment; GCS, Glasgow Coma Scale; SAPS II, Simplified Acute Physiology Score II.

The glycemic variability was categorized into tertiles as follows: T 1 (≤14.18), T 2 (14.19-19.07), T 3 (≥19.08).

Supplementary Table 6 Baseline characteristics according to the combination of the stress hyperglycemia ratio and glycemic variability

| Variables | G 1 (n=765) | G 2 (n=479) | G 3 (n=481) | G 4 (n=142) | p-value |
| --- | --- | --- | --- | --- | --- |
| Demographics |  |  |  |  |  |
| Age, (years) | 66.63±16.57 | 67.17±15.61 | 67.96±14.49 | 69.20±13.77 | 0.024 |
| Gender (male/female) | 418.00 (54.64%) | 263.00 (54.91%) | 264.00 (54.89%) | 82.00 (57.75%) | 0.924 |
| BMI, (kg/m2) | 26.34 (22.66-31.09) | 26.40 (22.94-31.89) | 26.76 (23.08-31.21) | 27.44 (24.35-31.60) | 0.203 |
| Vital signs |  |  |  |  |  |
| SBP, (mmHg) | 134.42±21.42 | 135.22±22.37 | 135.66±23.74 | 137.60±21.50 | 0.027 |
| DBP, (mmHg) | 73.17±16.04 | 75.56±17.40 | 75.04±19.72 | 76.23±18.08 | 0.047 |
| MAP, (mmHg) | 89.46±15.85 | 91.47±17.40 | 90.82±18.01 | 92.22±17.45 | 0.017 |
| RR, (insp/min) | 18.00 (15.00-21.00) | 18.00 (15.00-21.00) | 19.00 (16.00-22.00) | 18.00 (15.00-21.00) | 0.176 |
| HR, (bpm) | 82.00 (71.00-93.00) | 79.00 (69.00-91.00) | 82.00 (72.00-94.00) | 82.50 (71.00-94.00) | 0.115 |
| Comorbidities |  |  |  |  |  |
| Hypertension | 455.00 (59.48%) | 310.00 (64.72%) | 308.00 (64.03%) | 99.00 (69.72%) | 0.026 |
| Diabetes | 186.00 (24.31%) | 57.00 (11.90%) | 172.00 (35.76%) | 45.00 (31.69%) | <0.001 |
| AKI | 103.00 (13.46%) | 97.00 (20.25%) | 120.00 (24.94%) | 41.00 (28.87%) | <0.001 |
| Pneumonia | 174.00 (22.75%) | 84.00 (17.54%) | 147.00 (30.56%) | 45.00 (31.69%) | <0.001 |
| CKD | 90.00 (11.76%) | 37.00 (7.72%) | 67.00 (13.93%) | 20.00 (14.08%) | 0.014 |
| Cancer | 112.00 (14.64%) | 77.00 (16.08%) | 72.00 (14.97%) | 20.00 (14.08%) | 0.896 |
| Hyperlipidemia | 281.00 (36.73%) | 196.00 (40.92%) | 201.00 (41.79%) | 53.00 (37.32%) | 0.250 |
| HF | 99.00 (12.94%) | 45.00 (9.39%) | 72.00 (14.97%) | 22.00 (15.49%) | 0.047 |
| MI | 34.00 (4.44%) | 13.00 (2.71%) | 21.00 (4.37%) | 9.00 (6.34%) | 0.218 |
| IHD | 152.00 (19.87%) | 81.00 (16.91%) | 97.00 (20.17%) | 30.00 (21.13%) | 0.484 |
| COPD | 58.00 (7.58%) | 43.00 (8.98%) | 41.00 (8.52%) | 6.00 (4.23%) | 0.290 |
| Treatment during hospitalization |  |  |  |  |  |
| Anti-diabetes drugs | 175.00 (22.88%) | 52.00 (10.86%) | 138.00 (28.69%) | 27.00 (19.01%) | <0.001 |
| Anti-hypertensive drugs | 450.00 (58.82%) | 284.00 (59.29%) | 276.00 (57.38%) | 79.00 (55.63%) | 0.034 |
| Laboratory tests |  |  |  |  |  |
| Glucose, (mg/dL) | 115.00  (98.00-133.00) | 106.00 (95.00-119.00) | 166.00  (143.00-204.00) | 141.00 (126.00-172.00) | <0.001 |
| D-Dimer, (ng/mL) | 2,084.00 (1,045.00-3,535.00) | 1,883.00 (1,019.00-3,400.00) | 2,000.00 (1,045.00-3,459.00) | 1,783.50 (1,075.00-3,400.00) | 0.702 |
| PT, (s) | 12.70 (11.80-13.80) | 12.50 (11.70-13.54) | 12.80 (11.80-13.90) | 12.60 (11.60-13.70) | 0.263 |
| HDL, (mg/dL) | 46.00 (35.00-59.00) | 48.00 (38.00-61.00) | 44.00 (33.00-56.00) | 50.50 (38.00-64.00) | <0.001 |
| LDL, (mg/dL) | 71.00 (47.00-97.00) | 74.00 (50.00-100.00) | 64.00 (43.00-88.00) | 68.50 (47.00-95.00) | 0.003 |
| Triglycerides, (mg/dL) | 103.00 (68.00-136.00) | 97.00 (68.00-132.00) | 106.00 (72.00 -136.00) | 92.50 (69.00-132.00) | 0.242 |
| ALT, (IU/L) | 25.00 (16.00-43.00) | 23.00 (15.00-38.00) | 24.00 (16.00-40.00) | 24.00 (17.00-44.00) | 0.231 |
| AST, (IU/L) | 30.00 (20.00-50.00) | 28.00 (20.00-44.00) | 29.00 (21.00-47.00) | 29.50 (20.00-47.00) | 0.507 |
| Creatinine, (mg/dL) | 0.90 (0.70-1.10) | 0.80 (0.70-1.00) | 0.90 (0.70-1.20) | 0.90 (0.70-1.10) | <0.001 |
| Urea nitrogen, (mg/dL) | 16.00 (12.00-22.00) | 14.00 (11.00-19.00) | 18.00 (13.00-26.00) | 16.00 (12.00-21.00) | <0.001 |
| Hemoglobin, (g/dL) | 12.40 (11.00-13.50) | 12.40 (11.10-13.60) | 12.00 (10.70-13.50) | 12.70 (11.40-13.90) | 0.005 |
| Platelet, (K/UL) | 209.00  (163.00-261.00) | 211.00 (169.00-268.00) | 203.00  (158.00-252.00) | 201.50 (163.00-273.00) | 0.126 |
| WBC, (K/UL) | 10.50 (8.10-13.30) | 9.90 (7.70-12.40) | 11.00 (8.60-13.80) | 10.80 (8.40-13.60) | <0.001 |
| RBC, (m/uL) | 4.12 (3.66-4.52) | 4.10 (3.69-4.51) | 4.04 (3.57-4.42) | 4.19 (3.76-4.60) | 0.024 |
| HbA1c, (%) | 6.00 (5.60-6.90) | 5.80 (5.40-6.30) | 5.70 (5.30-6.30) | 5.40 (5.20-5.80) | <0.001 |
| AG, (mEq/L) | 14.00 (12.00-16.00) | 14.00 (12.00-16.00) | 14.00 (13.00-16.00) | 14.00 (13.00-16.00) | 0.001 |
| Sodium, (mEq/L) | 139.00  (137.00-142.00) | 139.00 (137.00-142.00) | 139.00  (137.00-142.00) | 140.00 (136.00-142.00) | 0.925 |
| Potassium, (mEq/L) | 3.90 (3.60-4.30) | 3.90 (3.60-4.20) | 3.90 (3.60-4.40) | 3.90 (3.70-4.40) | 0.410 |
| Outcomes |  |  |  |  |  |
| SOFA scores | 3.00 (2.00-5.00) | 2.00 (1.00-4.00) | 3.00 (2.00-5.00) | 4.00 (2.00-7.00) | <0.001 |
| SAPS II | 33.00 (26.00-40.00) | 34.00 (26.00-41.00) | 33.00 (28.00-41.00) | 34.00 (27.00-40.00) | 0.559 |
| GCS scores | 14.00 (11.00-15.00) | 14.00 (12.00-15.00) | 13.00 (11.00-15.00) | 12.00 (10.00-14.00) | <0.001 |
| Length of ICU stay, (days) | 5.14 (2.87-10.42) | 4.07 (2.28-8.01) | 6.20 (3.14-11.82) | 5.33 (2.93-10.73) | <0.001 |
| Length of hospital stay, (days) | 9.43 (5.73-18.27) | 8.94 (5.74-13.82) | 11.64 (6.81-20.06) | 12.66 (7.68-20.20) | <0.001 |

BMI indicates body mass index; SBP, systolic blood pressure; DBP, diastolic blood pressure; MAP, mean arterial pressure; RR, respiratory rate; HR, heart rate; AKI, acute kidney injury; CKD, chronic kidney disease; MI, myocardial infarction; HF, heart failure; IHD, ischaemic heart disease; COPD, chronic obstructive pulmonary disease; SHR, stress hyperglycemia ratio; GV, glycemic variability; PT, prothrombin time; ALT, alanine aminotransferase; AST, aspartate aminotransferase; HDL, high-density lipoprotein; LDL, low-density lipoprotein; WBC, white blood cell; RBC, red blood cell; HbA1c, hemoglobin A1c; AG, anion gap; SOFA, Sequential Organ Failure Assessment; GCS, Glasgow Coma Scale; SAPS II, Simplified Acute Physiology Score II.

G1: SHR≤1.14 and GV≤19.07; G2: SHR≤1.14 and GV＞19.07; G3: SHR＞1.14 and GV≤19.07; G4: SHR＞1.14 and GV＞19.07.

Supplementary Table 7 Univariate and multivariate Cox regression analysis of 1-year mortality

| Variables | Univariate analysis | | | Multivariate analysis | | |
| --- | --- | --- | --- | --- | --- | --- |
| HR | 95% CI | P value | HR | 95% CI | P value |
| Demographics |  |  |  |  |  |  |
| Age, (years) | 1.007 | 1.000-1.013 | 0.039 | 1.005 | 0.998-1.013 | 0.126 |
| Gender (male/female) | 1.058 | 0.870-1.287 | 0.574 | - | - | - |
| BMI, (kg/m2) | 0.994 | 0.981-1.007 | 0.350 | - | - | - |
| Vital signs |  |  |  |  |  |  |
| SBP, (mmHg) | 0.983 | 0.967-1.001 | 0.065 | - | - | - |
| DBP, (mmHg) | 0.995 | 0.984-1.014 | 0.211 | - | - | - |
| MAP, (mmHg) | 1.030 | 0.977-1.142 | 0.235 | - | - | - |
| RR, (insp/min) | 1.740 | 0.859-3.470 | 0.132 | - | - | - |
| HR, (bpm) | 1.013 | 0.962-1.090 | 0.630 | - | - | - |
| Comorbidities |  |  |  |  |  |  |
| Hypertension | 0.797 | 0.655-0.971 | 0.024 | 0.876 | 0.699-1.134 | 0.347 |
| Diabetes | 1.308 | 1.057-1.620 | 0.014 | 0.920 | 0.719-1.178 | 0.510 |
| AKI | 2.093 | 1.697-2.581 | <0.001 | 0.890 | 0.707-1.159 | 0.401 |
| Pneumonia | 1.679 | 1.366-2.064 | <0.001 | 0.938 | 0.733-1.187 | 0.533 |
| CKD | 1.435 | 1.095-1.880 | 0.009 | 0.865 | 0.622-1.203 | 0.388 |
| Cancer | 0.872 | 0.656-1.159 | 0.346 | - | - | - |
| Hyperlipidemia | 0.877 | 0.716-1.073 | 0.202 | - | - | - |
| HF | 1.425 | 1.097-1.852 | 0.008 | 0.997 | 0.742-1.342 | 0.986 |
| MI | 1.948 | 1.335-2.842 | 0.001 | 1.472 | 0.994-2.180 | 0.054 |
| IHD | 1.221 | 0.966-1.543 | 0.095 | - | - | - |
| COPD | 1.104 | 0.781-1.562 | 0.575 | - | - | - |
| Treatment during hospitalization |  |  |  |  |  |  |
| Anti-diabetes drugs | 0.979 | 0.831-1.698 | 0.393 | - | - | - |
| Anti-hypertensive drugs | 1.187 | 0.745-1.882 | 0.461 | - | - | - |
| Laboratory tests |  |  |  |  |  |  |
| Glucose, (mg/dL) | 1.006 | 1.005-1.007 | <0.001 | 0.885 | 0.701-1.117 | 0.304 |
| SHR, (mean±standard deviation) | 2.337 | 2.008-2.719 | <0.001 | 1.596 | 1.133-2.248 | 0.007 |
| GV, (%) | 1.970 | 1.597-2.183 | <0.001 | 1.307 | 1.072-1.698 | 0.002 |
| D-Dimer, (ng/mL) | 1.028 | 0.670-1.387 | 0.465 | - | - | - |
| PT, (s) | 0.991 | 0.987-1.003 | 0.348 | - | - | - |
| HDL, (mg/dL) | 0.768 | 0.632-0.933 | 0.008 | 1.002 | 0.996-1.007 | 0.498 |
| LDL, (mg/dL) | 0.994 | 0.989-0.999 | 0.030 | 0.993 | 0.98-1.006 | 0.276 |
| Triglycerides, (mg/dL) | 1.001 | 1.000-1.002 | 0.003 | 1.001 | 1.000-1.001 | 0.070 |
| ALT, (IU/L) | 1.004 | 0.681-1.462 | 0.549 | - | - | - |
| AST, (IU/L) | 0.684 | 0.881-1.107 | 0.214 | - | - | - |
| Creatinine, (mg/dL) | 1.095 | 1.064-1.127 | <0.001 | 0.972 | 0.943-1.003 | 0.072 |
| Urea nitrogen, (mg/dL) | 0.961 | 0.842-1.168 | 0.698 | - | - | - |
| Hemoglobin, (g/dL) | 0.892 | 0.851-0.934 | <0.001 | 0.989 | 0.965-1.120 | 0.097 |
| Platelet, (K/UL) | 0.934 | 0.852-1.023 | 0.139 | - | - | - |
| WBC, (K/UL) | 1.268 | 1.016-1.583 | 0.036 | 1.004 | 0.999-1.008 | 0.095 |
| RBC, (m/uL) | 1.154 | 0.734-1.813 | 0.535 | - | - | - |
| HbA1c, (%) | 0.991 | 0.916-1.071 | 0.812 | - | - | - |
| AG, (mEq/L) | 1.057 | 1.032-1.084 | <0.001 | 1.024 | 0.997-1.051 | 0.077 |
| Sodium, (mEq/L) | 1.009 | 0.988-1.030 | 0.413 | - | - | - |
| Potassium, (mEq/L) | 1.070 | 0.697-1.643 | 0.757 | - | - | - |
| Outcomes |  |  |  |  |  |  |
| SOFA scores | 0.927 | 0.921-0.978 | 0.001 | 1.037 | 1.020-1.055 | <0.001 |
| SAPS II | 0.931 | 0.756-1.205 | 0.576 | - | - | - |
| GCS scores | 0.957 | 0.928-0.987 | 0.005 | 1.064 | 1.023-1.106 | 0.002 |

BMI indicates body mass index; SBP, systolic blood pressure; DBP, diastolic blood pressure; MAP, mean arterial pressure; RR, respiratory rate; HR, heart rate; AKI, acute kidney injury; CKD, chronic kidney disease; MI, myocardial infarction; HF, heart failure; IHD, ischaemic heart disease; COPD, chronic obstructive pulmonary disease; SHR, stress hyperglycemia ratio; GV, glycemic variability; PT, prothrombin time; ALT, alanine aminotransferase; AST, aspartate aminotransferase; HDL, high-density lipoprotein; LDL, low-density lipoprotein; WBC, white blood cell; RBC, red blood cell; HbA1c, hemoglobin A1c; AG, anion gap; SOFA, Sequential Organ Failure Assessment; GCS, Glasgow Coma Scale; SAPS II, Simplified Acute Physiology Score II; HR, hazard ratio; CI, confidence interval.

Supplementary Table 8 Univariate and multivariate logistic regression analysis of in-hospital mortality

| Variables | Univariate analysis | | | Multivariate analysis | | |
| --- | --- | --- | --- | --- | --- | --- |
| OR | 95% CI | P value | OR | 95% CI | P value |
| Demographics |  |  |  |  |  |  |
| Age, (years) | 0.999 | 0.991-1.008 | 0.864 | - | - | - |
| Gender (male/female) | 1.163 | 0.898-1.508 | 0.252 | - | - | - |
| BMI, (kg/m2) | 1.009 | 0.992-1.025 | 0.314 | - | - | - |
| Vital signs |  |  |  |  |  |  |
| SBP, (mmHg) | 0.994 | 0.988-1.000 | 0.036 | 0.996 | 0.989-1.003 | 0.266 |
| DBP, (mmHg) | 0.993 | 0.985-1.000 | 0.047 | 0.997 | 0.989-1.006 | 0.563 |
| MAP, (mmHg) | 0.991 | 0.938-1.045 | 0.117 | - | - | - |
| RR, (insp/min) | 0.995 | 0.954-1.039 | 0.132 | - | - | - |
| HR, (bpm) | 1.004 | 0.997-1.012 | 0.256 | - | - | - |
| Comorbidities |  |  |  |  |  |  |
| Hypertension | 0.718 | 0.554-0.930 | 0.012 | 1.053 | 0.943-1.547 | 0.154 |
| Diabetes | 1.452 | 1.096-1.922 | 0.009 | 0.925 | 0.650-1.317 | 0.667 |
| AKI | 2.686 | 2.028-3.556 | <0.001 | 1.270 | 0.885-1.824 | 0.195 |
| Pneumonia | 1.699 | 1.287-2.241 | <0.001 | 1.233 | 0.903-1.684 | 0.188 |
| CKD | 1.759 | 1.236-2.502 | 0.002 | 0.903 | 0.568-1.435 | 0.665 |
| Cancer | 0.714 | 0.628-1.061 | 0.143 | - | - | - |
| Hyperlipidemia | 0.823 | 0.631-1.075 | 0.154 | - | - | - |
| HF | 1.512 | 1.067-2.142 | 0.020 | 0.985 | 0.655-1.479 | 0.940 |
| MI | 1.820 | 1.056-3.135 | 0.031 | 1.183 | 0.640-2.189 | 0.591 |
| IHD | 1.233 | 0.903-1.682 | 0.187 | - | - | - |
| COPD | 1.194 | 0.761-1.874 | 0.440 | - | - | - |
| Treatment during hospitalization |  |  |  |  |  |  |
| Anti-diabetes drugs | 1.427 | 0.968-2.105 | 0.116 | - | - | - |
| Anti-hypertensive drugs | 1.350 | 0.952-2.060 | 0.105 | - | - | - |
| Laboratory tests |  |  |  |  |  |  |
| Glucose, (mg/dL) | 1.008 | 1.006-1.011 | <0.001 | 1.003 | 0.999-1.007 | 0.185 |
| SHR, (mean±standard deviation) | 3.475 | 2.600-4.645 | <0.001 | 2.177 | 1.341-3.535 | 0.002 |
| GV, (%) | 2.355 | 1.537-2.973 | <0.001 | 1.978 | 1.49-2.217 | 0.025 |
| D-Dimer, (ng/mL) | 1.191 | 0.781-2.397 | 0.078 | - | - | - |
| PT, (s) | 1.040 | 1.014-1.067 | 0.002 | 1.013 | 0.991-1.035 | 0.264 |
| HDL, (mg/dL) | 0.995 | 0.988-1.002 | 0.185 | - | - | - |
| LDL, (mg/dL) | 0.994 | 0.991-0.998 | 0.002 | 0.996 | 0.992-1.000 | 0.071 |
| Triglycerides, (mg/dL) | 1.001 | 1.000-1.003 | 0.010 | 1.001 | 1.000-1.002 | 0.085 |
| ALT, (IU/L) | 1.073 | 0.928-2.156 | 0.263 | - | - | - |
| AST, (IU/L) | 1.005 | 0.875-1.769 | 0.115 | - | - | - |
| Creatinine, (mg/dL) | 1.323 | 1.197-1.463 | <0.001 | 0.876 | 0.634-1.210 | 0.421 |
| Urea nitrogen, (mg/dL) | 1.019 | 0.886-1.775 | 0.137 | - | - | - |
| Hemoglobin, (g/dL) | 0.878 | 0.826-0.935 | <0.001 | 1.141 | 0.98-1.329 | 0.090 |
| Platelet, (K/UL) | 0.997 | 0.995-0.999 | 0.001 | 0.999 | 0.997-1.000 | 0.098 |
| WBC, (K/UL) | 1.010 | 1.000-1.019 | 0.051 | - | - | - |
| RBC, (m/uL) | 0.634 | 0.529-0.758 | <0.001 | 0.978 | 0.937-1.020 | 0.296 |
| HbA1c, (%) | 0.984 | 0.886-1.091 | 0.755 | - | - | - |
| AG, (mEq/L) | 1.075 | 1.039-1.112 | <0.001 | 1.036 | 0.997-1.077 | 0.072 |
| Sodium, (mEq/L) | 1.288 | 1.080-1.535 | 0.005 | 1.000 | 0.973-1.027 | 0.989 |
| Potassium, (mEq/L) | 0.999 | 0.972-1.026 | 0.926 | - | - | - |
| Outcomes |  |  |  | - | - | - |
| SOFA scores | 0.927 | 0.865-0.991 | 0.036 | 1.216 | 1.133-1.306 | <0.001 |
| SAPS II | 1.056 | 0.892-1.875 | 0.179 | - | - | - |
| GCS scores | 0.959 | 0.921-0.998 | 0.040 | 0.552 | 0.355-0.858 | 0.008 |

BMI indicates body mass index; SBP, systolic blood pressure; DBP, diastolic blood pressure; MAP, mean arterial pressure; RR, respiratory rate; HR, heart rate; AKI, acute kidney injury; CKD, chronic kidney disease; MI, myocardial infarction; HF, heart failure; IHD, ischaemic heart disease; COPD, chronic obstructive pulmonary disease; SHR, stress hyperglycemia ratio; GV, glycemic variability; PT, prothrombin time; ALT, alanine aminotransferase; AST, aspartate aminotransferase; HDL, high-density lipoprotein; LDL, low-density lipoprotein; WBC, white blood cell; RBC, red blood cell; HbA1c, hemoglobin A1c; AG, anion gap; SOFA, Sequential Organ Failure Assessment; GCS, Glasgow Coma Scale; SAPS II, Simplified Acute Physiology Score II; OR, odds ratio; CI, confidence interval.

Supplementary Table 9 Predictive performance of the models

|  | Hosmer-Lemeshow test  (P value) | Omnibus test of model  (P value) |
| --- | --- | --- |
| Model 1 | 0.768 | <0.001 |
| Model 2 | 0.679 | <0.001 |
| Model 3 | 0.874 | <0.001 |
| Model 4 | 0.877 | <0.001 |

Model 1: unadjusted.

Model 2: adjusted for the variables in Model 1 plus age, gender, and body mass index.

Model 3: adjusted for the variables in Model 1 plus age, hypertension, acute kidney injury, pneumonia, chronic kidney disease, myocardial infarction, heart failure, glucose, high-density lipoprotein, low-density lipoprotein, triglycerides, creatinine, hemoglobin, white blood cell, anion gap.

Model 4: adjusted for the variables in Model 1 plus systolic blood pressure, diastolic blood pressure, hypertension, acute kidney injury, pneumonia, chronic kidney disease, myocardial infarction, heart failure, glucose, prothrombin time, low-density lipoprotein, triglycerides, creatinine, hemoglobin, platelet, red blood cell, anion gap, sodium.

Supplementary Table 10 Sensitivity analysis: the relationship between the combination of stress hyperglycemia ratio and glycemic variability and mortality in patients with or without diabetes

|  | Group | | | |
| --- | --- | --- | --- | --- |
| Low SHR and low GV  (SHR≤1.14 and  GV≤19.07) | Low SHR and high GV  (SHR≤1.14 and  GV＞19.07) | High SHR and low GV  (SHR＞1.14 and  GV≤19.07) | High SHR and high (SHR＞1.14 and  GV＞19.07) |
| 1-year mortality |  |  |  |  |
| Overall |  |  |  |  |
| Model 1 | Reference | 0.643 (0.472-0.876)* | 2.108 (1.679-2.646)* | 2.222 (1.603-3.079)* |
| Model 2 | Reference | 0.733 (0.537-0.933)* | 2.140 (1.702-2.690)* | 2.267 (1.634-3.145)* |
| Model 3 | Reference | 0.634 (0.464-0.868)* | 1.575 (1.214-2.042)* | 2.035 (1.455-2.846)* |
| Patients without diabetes |  |  |  |  |
| Model 1 | Reference | 0.637 (0.453-0.897)* | 2.186 (1.657-2.843)* | 2.003 (1.363-2.443)** |
| Model 2 | Reference | 0.698 (0.494-0.984)* | 2.281 (1.676-3.183)* | 2.022 (1.373-2.779)** |
| Model 3 | Reference | 0.630 (0.446-0.890)* | 2.159 (1.639-2.792)* | 1.653 (1.214-2.253)** |
| Patients with diabetes |  |  |  |  |
| Model 1 | Reference | 0.684 (0.304-1.540) | 2.540 (1.320-4.888)*** | 1.462 (1.203-2.368)* |
| Model 2 | Reference | 0.744 (0.346-1.598) | 2.994 (1.610-5.472)*** | 1.988 (1.320-2.995)* |
| Model 3 | Reference | 0.950 (0.438-2.057) | 3.102 (1.676-5.567)*** | 2.053 (1.357-3.104)* |
| In-hospital mortality |  |  |  |  |
| Overall |  |  |  |  |
| Model 1 | Reference | 0.509 (0.328-0.771)* | 1.775 (1.097-2.800)* | 2.483 (1.845-3.352)* |
| Model 2 | Reference | 0.593 (0.378-0.909)* | 1.794 (1.107-2.836)* | 2.554 (1.892-3.459)* |
| Model 4 | Reference | 0.500 (0.323-0.755)* | 1.569 (1.043-2.563)* | 1.805 (1.263-2.578)* |
| Patients without diabetes |  |  |  |  |
| Model 1 | Reference | 1.295 (1.084-2.924)* | 0.521 (0.319-0.831)* | 3.027 (2.111-4.358)** |
| Model 2 | Reference | 1.302 (1.101-3.016)* | 0.565 (0.341-0.910)* | 3.161 (2.195-4.576)** |
| Model 4 | Reference | 1.156 (1.038-2.875)* | 0.518 (0.317-0.823)* | 2.013 (1.300-3.112)** |
| Patients with diabetes |  |  |  |  |
| Model 1 | Reference | 0.544 (0.177-1.384) | 4.065 (1.583-9.374)** | 1.295 (1.083-2.536)** |
| Model 2 | Reference | 0.554 (0.181-1.392) | 4.148 (1.733-9.667)** | 1.616 (1.153-2.765)** |
| Model 4 | Reference | 0.798 (0.252-2.116) | 4.260 (2.583-11.299)*** | 1.700 (1.243-2.933)** |

Model 1: unadjusted.

Model 2: adjusted for the variables in Model 1 plus age, gender, and body mass index.

Model 3: adjusted for the variables in Model 1 plus age, glucose, low-density lipoprotein, triglycerides, creatinine, anion gap.

Model 4: adjusted for the variables in Model 1 plus acute kidney injury, glucose, prothrombin time, triglycerides, creatinine, hemoglobin, platelet, red blood cell, anion gap.

***P < 0.05, **P < 0.01, ***P < 0.001
