# Supplementary figures and images for: The impact of stress hyperglycemia ratio and glycemic variability on 1-year all-cause mortality in critically ill patients with intracerebral hemorrhage: a two-center retrospective study
Source: Research Square preprint supplement (doi:10.21203/rs.3.rs-8312482/v1), 2026-01-12

**
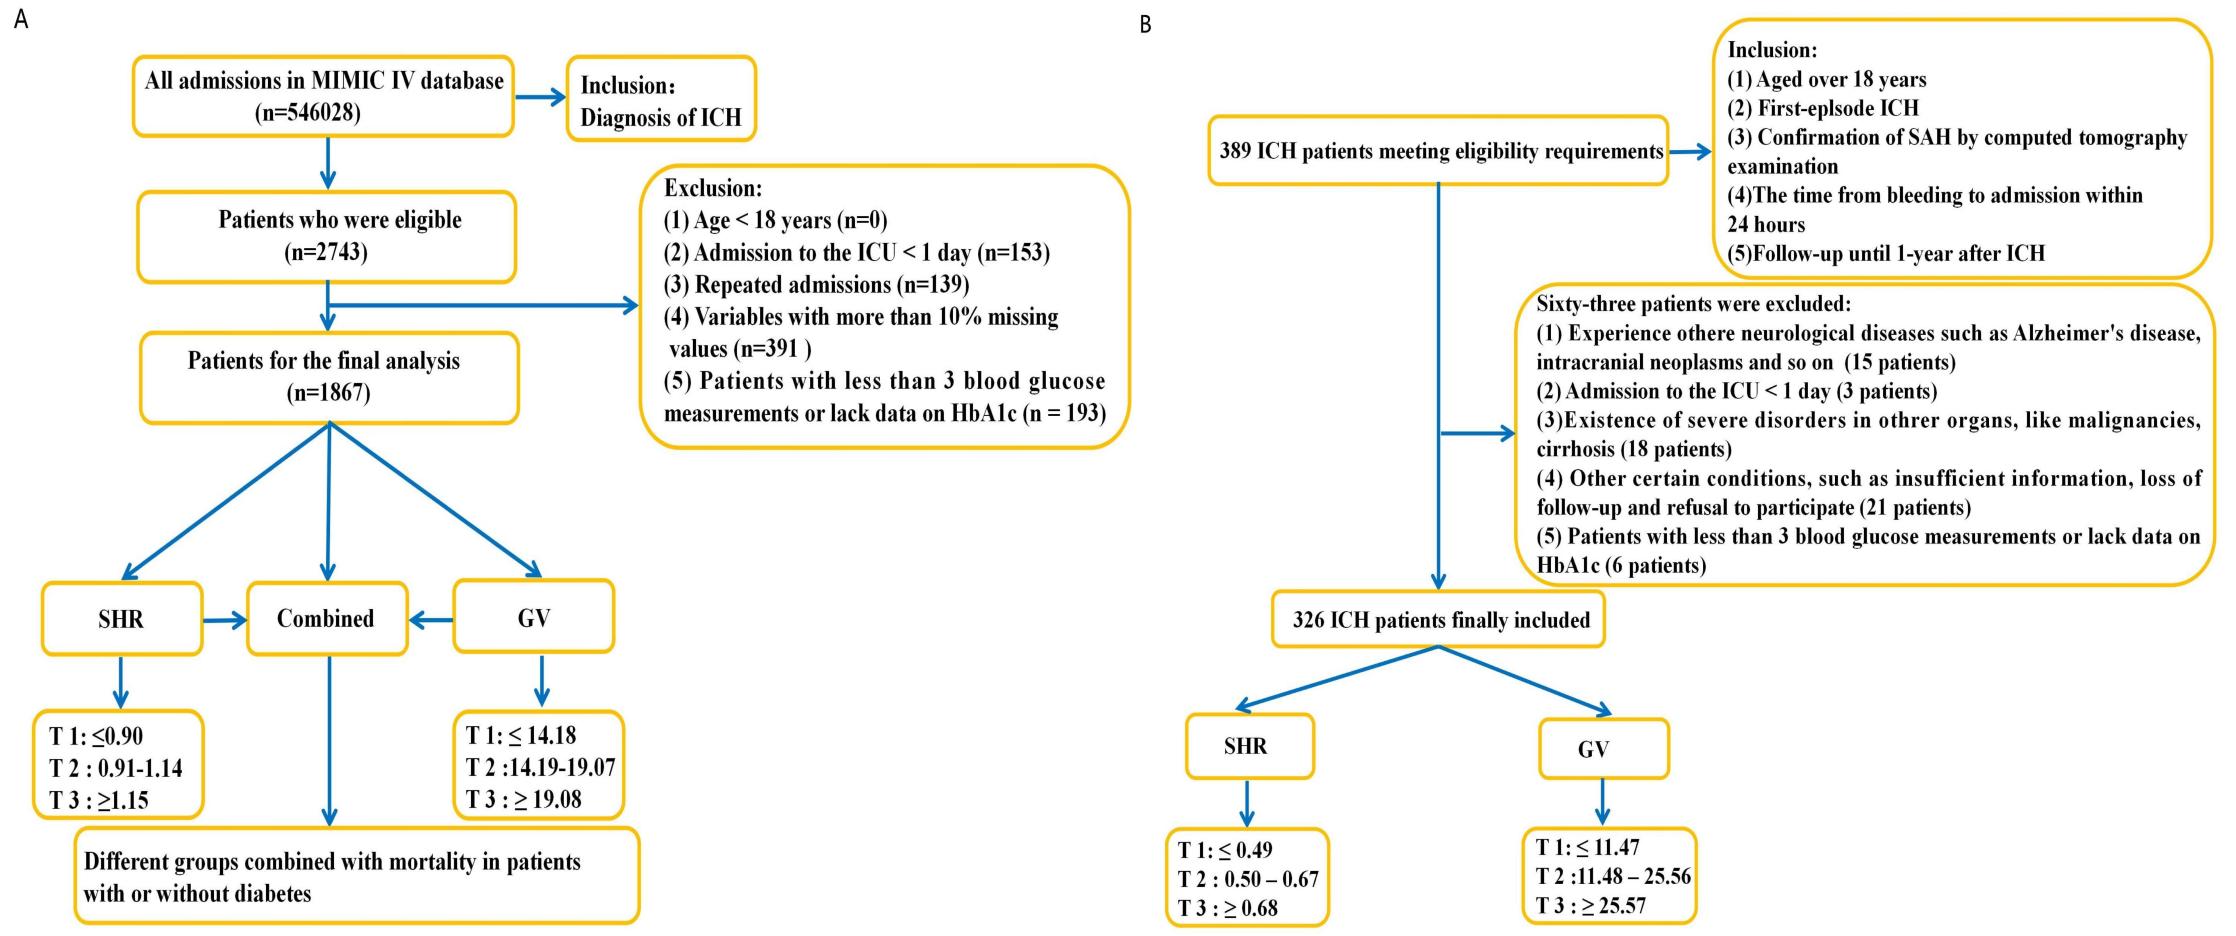
**

Supplementary Fig. 1

**
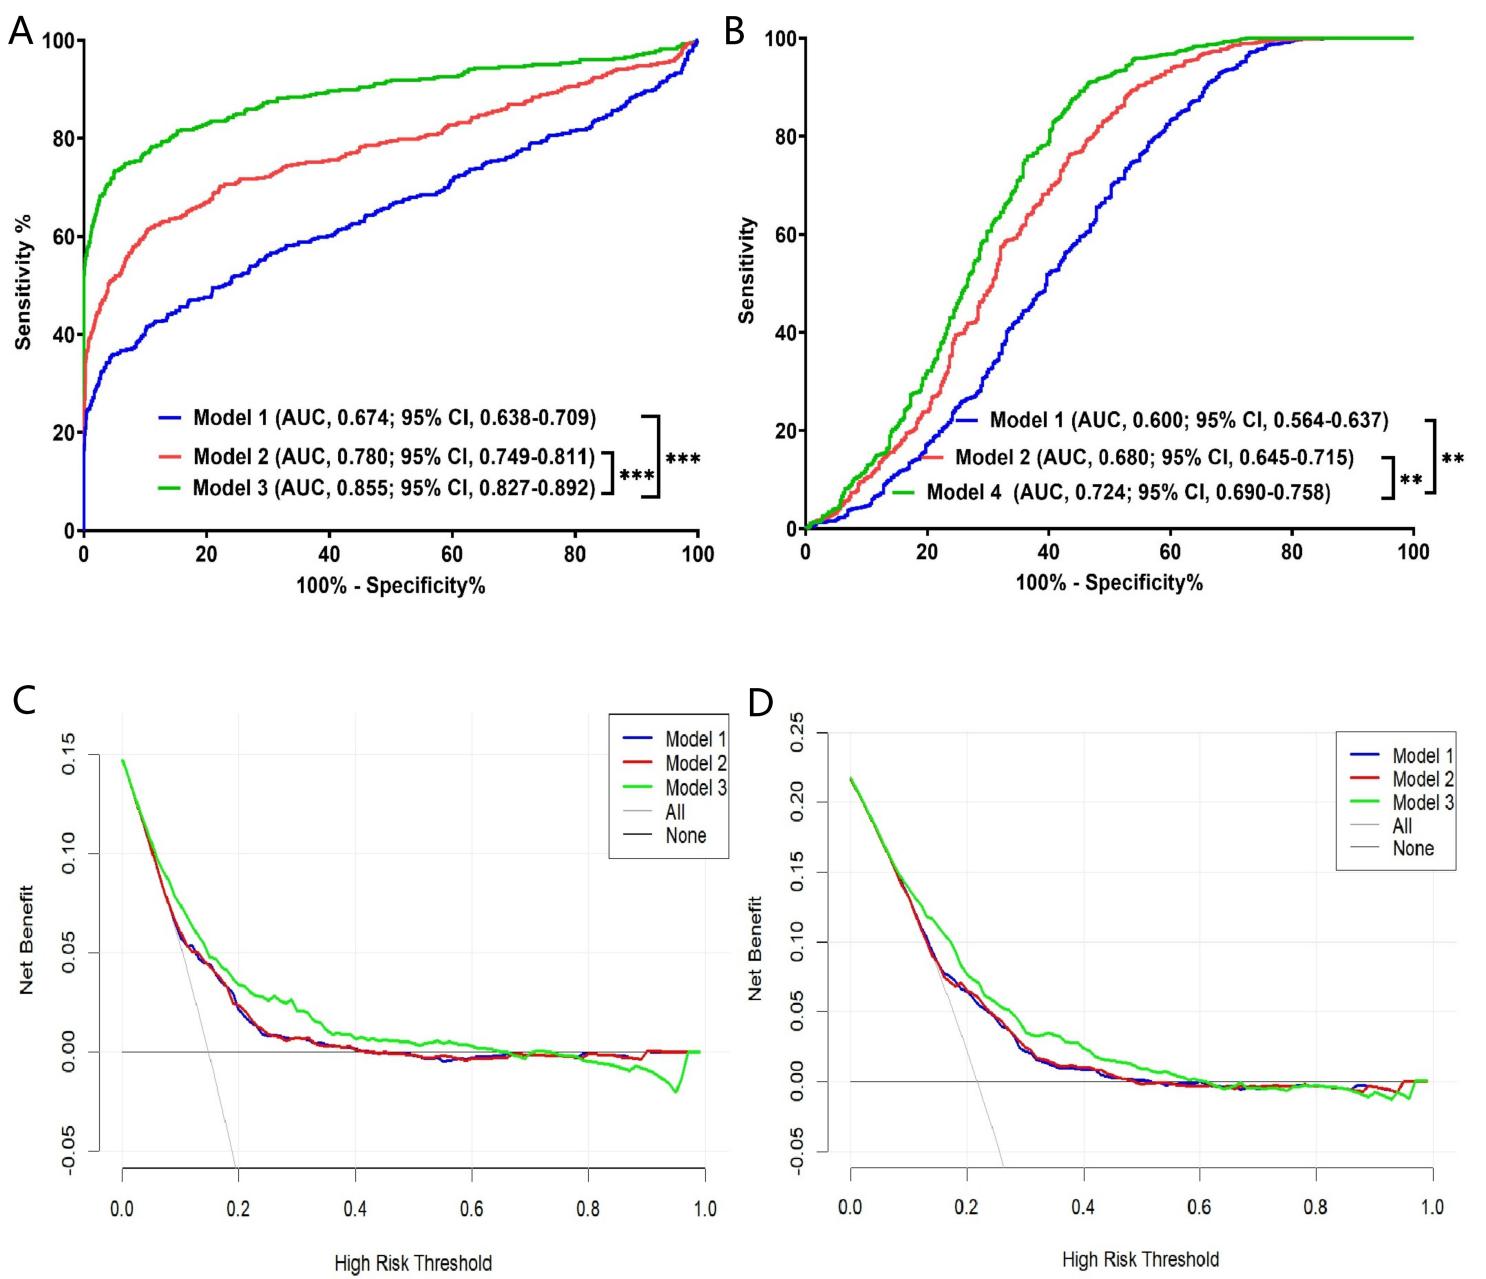
**

Supplementary Fig. 2

**
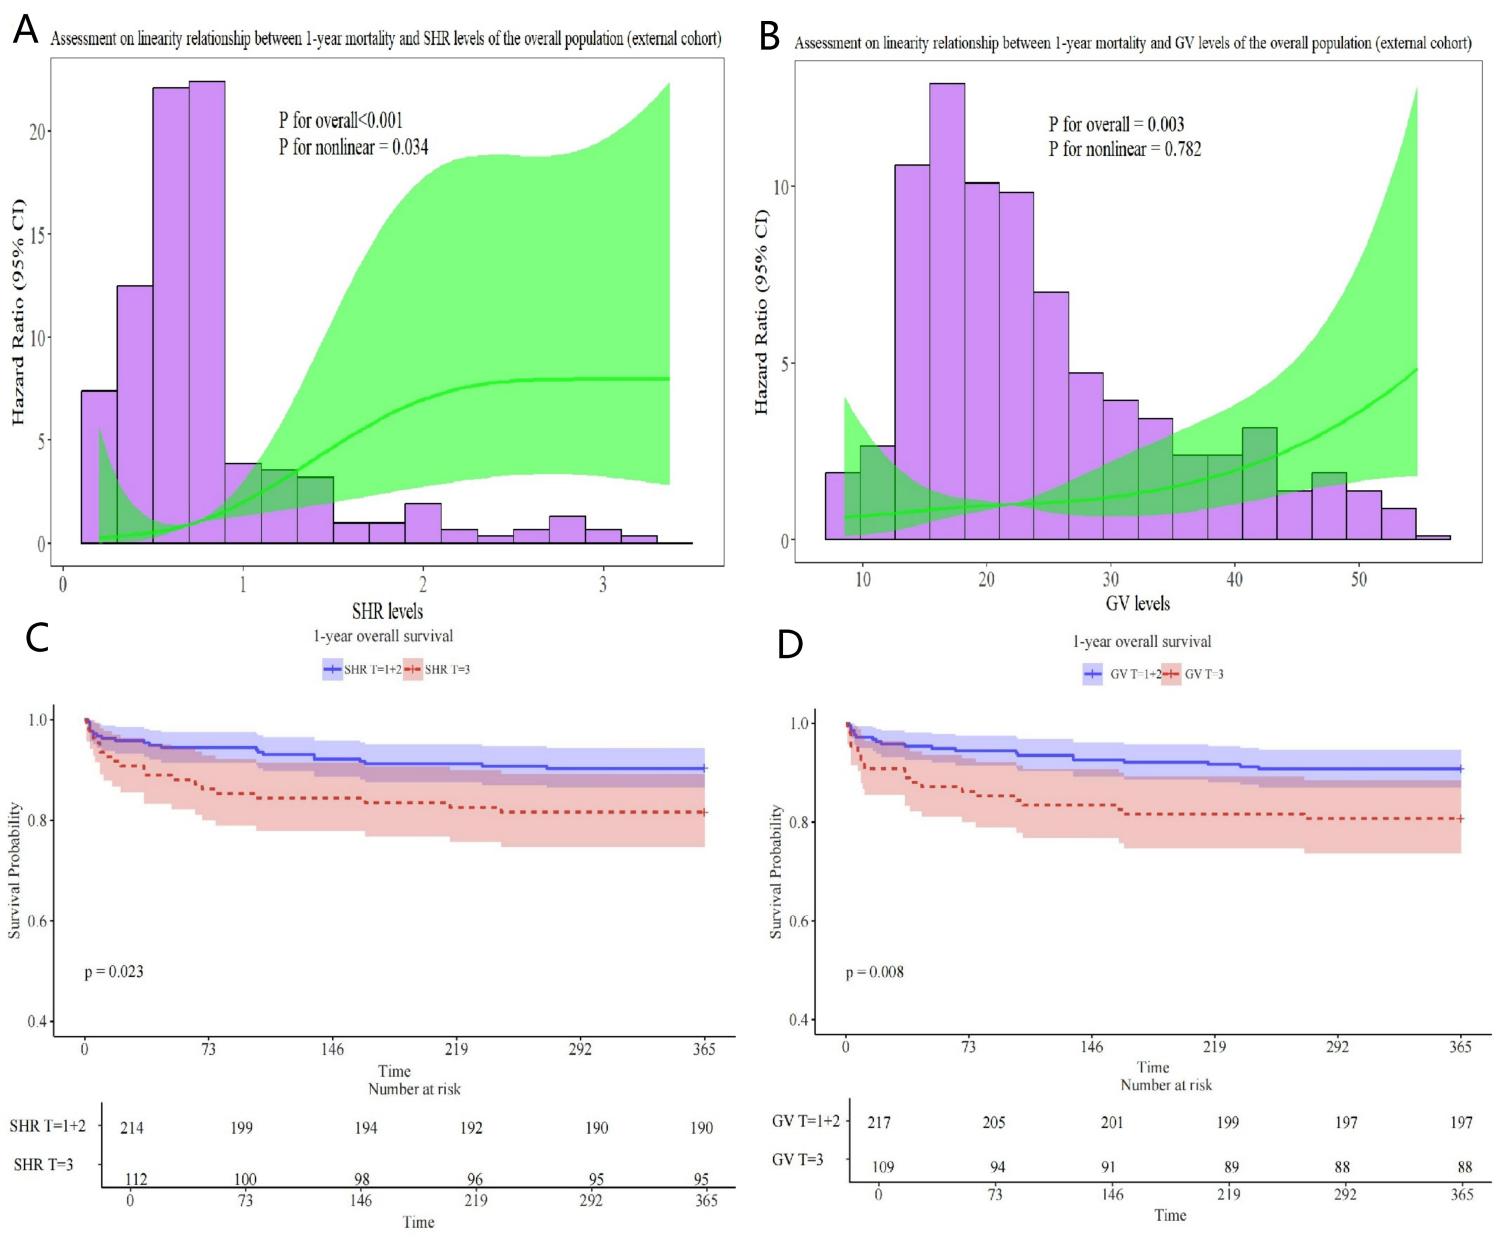
**

Supplementary Fig. 3

**
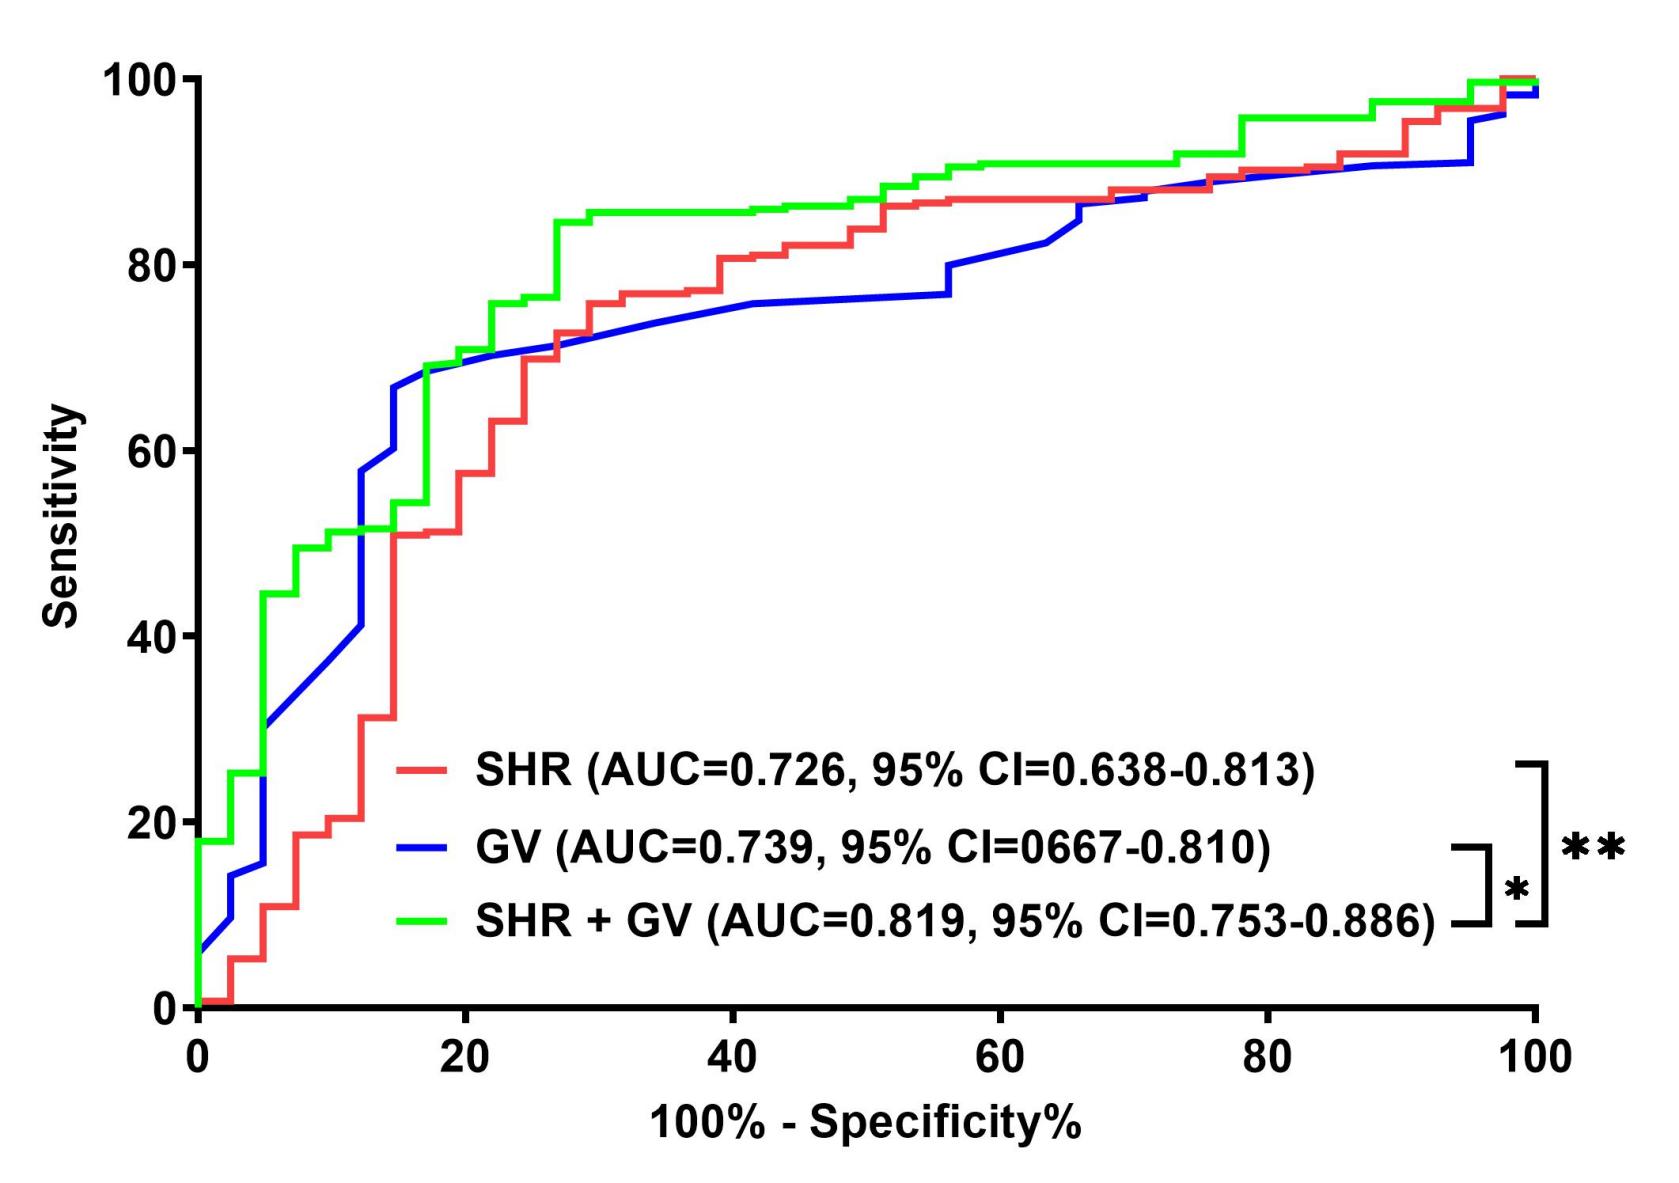
**

Supplementary Fig. 4

Supplement: Supplementary file 2 [file f5df102885dbecfc7db15623.docx]
